# Supplementary material for: PRKCQ promotes oncogenic growth and anoikis resistance of a subset of triple-negative breast cancer cells
Source: Springer Nature journal article supplement (doi:10.1186/s13058-016-0749-6), 2016-09-23

# Supplemental Fig 1

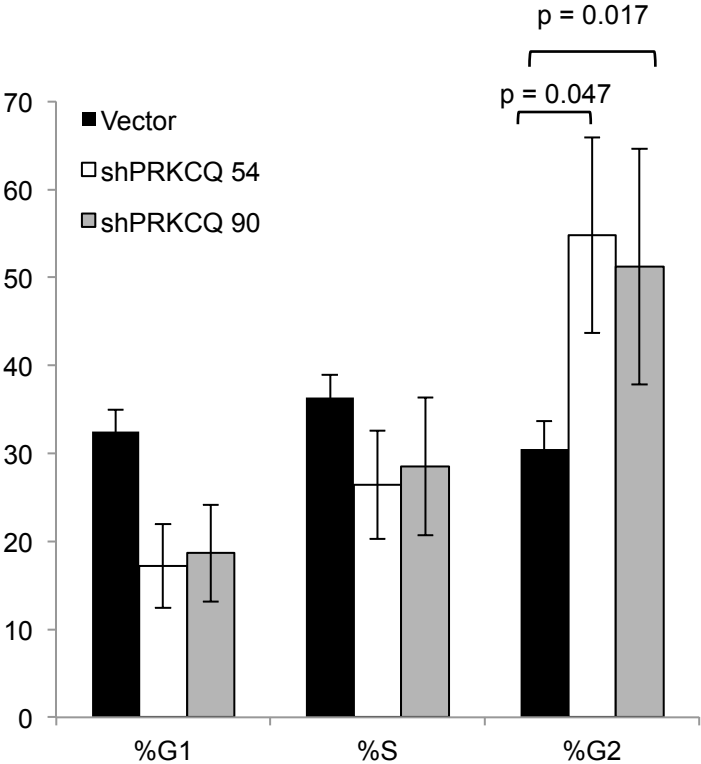

## Supplemental Fig 2

### MDA-231

**EV**

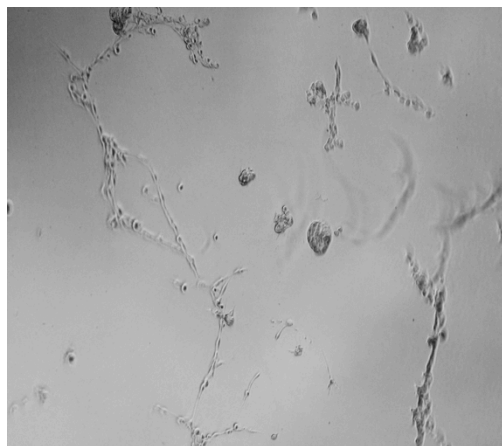

**shPRKCQ54**

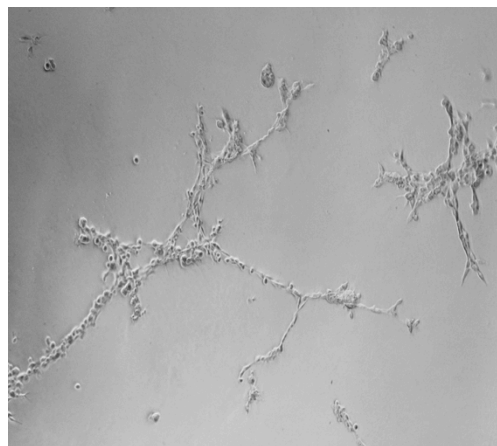

Supplement: MOESM1 [file 10740336]
